# Supplementary material for: Descriptive assessment of graduates’ perceptions of pharmacy-related competencies based on the Lebanese pharmacy core competencies framework
Source: PubMed Central journal article supplement — Pharm Pract (Granada). 2021 Jun 22;19(2):2320. doi: 10.18549/PharmPract.2021.2.2320 (PMC8234617; doi:10.18549/pharmpract.2021.2.2320), 2021-06-22
Supplement: pharmpract-19-2320-suppl.pdf [file pharmpract-19-2320-suppl.pdf]

**Online Appendix. Mean scores on self-declared pharmacy competencies**

| Domain                | Competency                                                                                                                                                                                   | Mean  | Standard Deviation |
|-----------------------|----------------------------------------------------------------------------------------------------------------------------------------------------------------------------------------------|-------|--------------------|
| Fundamental Knowledge | <b>Fundamental courses.</b> knowledge Knows and understands basics of scientific fundamental knowledge courses                                                                               | 63.89 | 21.94              |
|                       | <b>Patient care courses knowledge.</b> Knows and understands basics of patient care knowledge courses                                                                                        | 72.48 | 21.59              |
|                       | <b>Pharmaceutical courses knowledge.</b> Knows and understands basics of pharmaceuticals knowledge courses                                                                                   | 59.09 | 24.36              |
|                       | <b>Social, behavioral and administrative courses knowledge.</b> Knows and understands basics of social, behavioral and administrative knowledge courses                                      | 71.86 | 24.24              |
| Professional Practice | <b>Professional Practices.</b> Implements professional requirements to practice settings                                                                                                     | 83.04 | 21.56              |
|                       | <b>Ethical Practices.</b> Demonstrates awareness of codes of ethics and acts accordingly                                                                                                     | 65.02 | 18.77              |
|                       | <b>Legal Practices.</b> Demonstrates an understanding of the Lebanese pharmacy law and acts accordingly                                                                                      | 73.53 | 25.47              |
|                       | <b>Patient-Focused Practices.</b> Demonstrates a patient-focused approach to practice                                                                                                        | 80.13 | 23.82              |
|                       | <b>Continuing Professional Development (CPD).</b> Applies principles of continuing professional development including assessing own learning needs and developing a plan to meet these needs | 78.37 | 24.02              |
|                       | <b>Inter-Professional Collaboration.</b> Acts as a team member in all aspects of practice                                                                                                    | 80.21 | 21.99              |
| Personal skills       | <b>Leadership Skills.</b> Demonstrates leadership abilities in the team processes.                                                                                                           | 76.72 | 23.17              |
|                       | <b>Decision making skills.</b> Demonstrates the ability to take accurate, evidenced based and timely decisions                                                                               | 78.09 | 23.06              |
|                       | <b>Team Working Skills.</b> Recognizes the value of the pharmacy team and of a multi-disciplinary team and acts accordingly                                                                  | 76.63 | 24.54              |
|                       | <b>Communication Skills.</b> Communicates effectively with patients and their caregivers, with other healthcare professionals, other support staff, and other relevant third parties         | 78.12 | 23.34              |
|                       | <b>Information Technology (IT).</b> Skills Applies a minimum of IT in daily work                                                                                                             | 77.23 | 26.29              |
|                       | <b>Self-Awareness</b> Demonstrates accurate self-assessment, willingness to learn from errors, and controlled behaviors towards stress and work overload                                     | 77.14 | 24.57              |
|                       | <b>Innovation and Entrepreneurship.</b> Develops new ideas to improve quality or overcome barriers to enhance the profession                                                                 | 73.16 | 25.24              |
| Medicines supply      | <b>Manufacture and Compounding of Medicines.</b> Performs efficiently various tasks in pharmaceutical plant and product quality control units.                                               | 63.94 | 27.33              |

| Domain                             | Competency                                                                                                                 | Mean  | Standard |
|------------------------------------|----------------------------------------------------------------------------------------------------------------------------|-------|----------|
|                                    | <b>Supply Chain Management.</b> Ensures the quality, safety and integrity of products                                      | 64.98 | 26.53    |
|                                    | <b>Dispensing Medicines.</b> Dispenses a product safely and accurately that is appropriate for the patient.                | 73.35 | 26.19    |
| Safe and Rational Use of Medicines | <b>Patient Consultation Skills.</b> Gathers information and discusses with the patient medication and disease issues       | 76.88 | 22.96    |
|                                    | <b>Patient Counseling and Advocacy Skills.</b> Counsels patients and acts to promote the best patient care                 | 78.21 | 22.92    |
|                                    | <b>Monitors medicines use.</b> Monitors the patient's progress and assess therapeutic outcomes                             | 75.74 | 25.28    |
|                                    | <b>Monitors medication safety.</b> Prioritizes medication safety and acts accordingly                                      | 72.90 | 26.71    |
|                                    | <b>Working Environment Safety.</b> Creates and maintains a working environment that promotes safety                        | 73.03 | 25.65    |
| Pharmaceutical Public Health       | <b>Population Health.</b> Engages in health promotion activities with the patient                                          | 70.17 | 26.77    |
|                                    | <b>Health Education and Promotion.</b> Actively participates in health promotion issues                                    | 72.70 | 25.75    |
|                                    | <b>Medicines Information and Advice.</b> Responds to questions using appropriate strategies                                | 72.43 | 25.77    |
|                                    | <b>Research and Education.</b> Applies knowledge, research skills and professional judgment to the decision-making process | 73.60 | 24.62    |
| Organization and Management        | <b>Self-Management at Work.</b> Demonstrates personal organizational and management skills at work.                        | 77.61 | 23.61    |
|                                    | <b>Workplace Management.</b> Applies management principles and skills relevant to the workplace                            | 76.78 | 23.22    |
|                                    | <b>Human Resources Management.</b> Applies management principles and skills relevant to human resource                     | 73.52 | 25.53    |
|                                    | <b>Budget, Reimbursement and Administration.</b> Applies management principles and skills relevant to financial resources  | 71.89 | 24.35    |
|                                    | <b>Quality Assurance.</b> Applies principles and skills relevant to quality assurance                                      | 70.79 | 24.15    |
|                                    | <b>Pharmaceutical Product Development.</b> Understands the principles of pharmaceutical product development                | 71.22 | 28.81    |
